# Supplementary material for: Insights into a defined secondary binding region on β-adrenoceptors and putative roles in ligand binding and drug design
Source: Royal Society of Chemistry journal article supplement (doi:10.1039/c5md00011d), 2015-01-01
Supplement: c5md00011d1.pdf [file c5md00011d1.pdf]

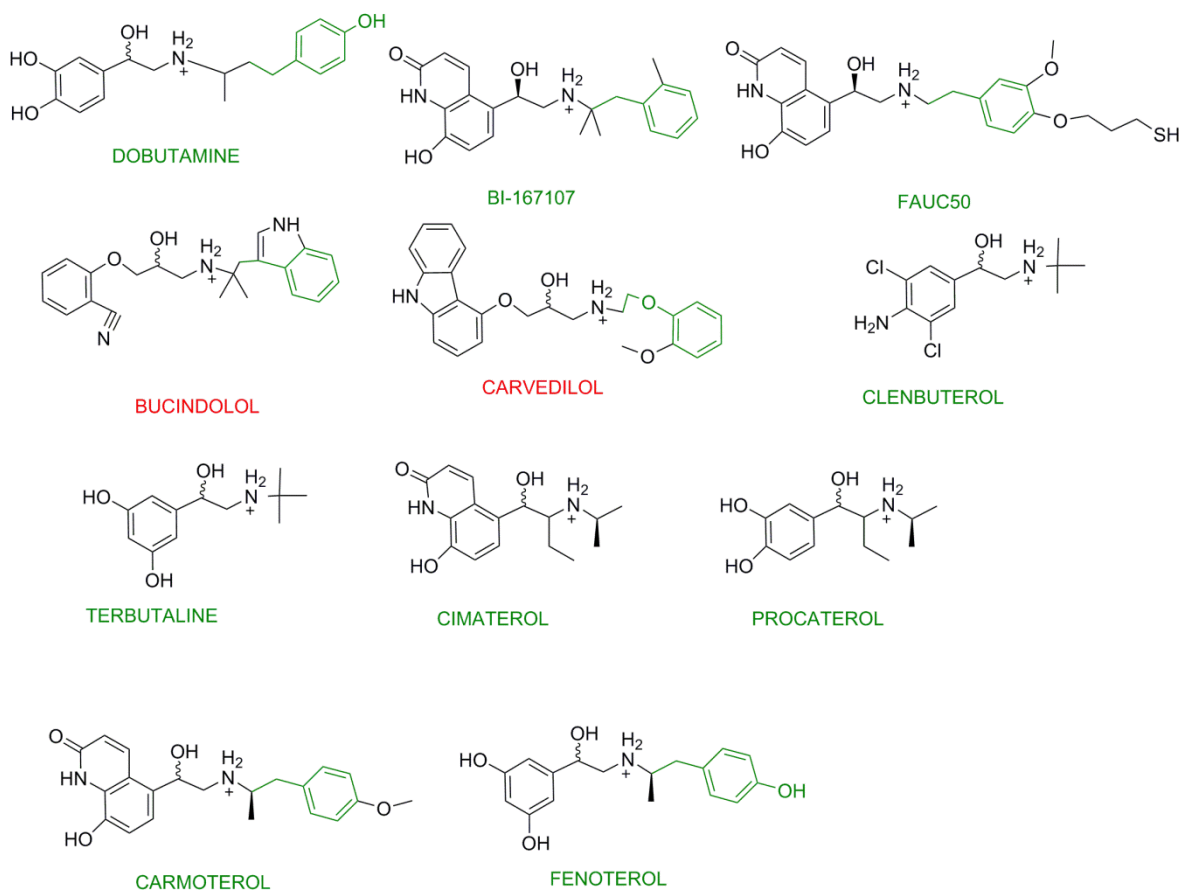

**Suppl. Fig. 1.** Structures of some  $\beta_{1-3}$ AR ligands mentioned in the manuscript. The moieties proposed to contact the secondary binding region of  $\beta$ ARs are marked in green. The labels are in green letters for ligands considered as a full or partial agonist, and in red for ligands considered as an antagonist or inverse agonist.



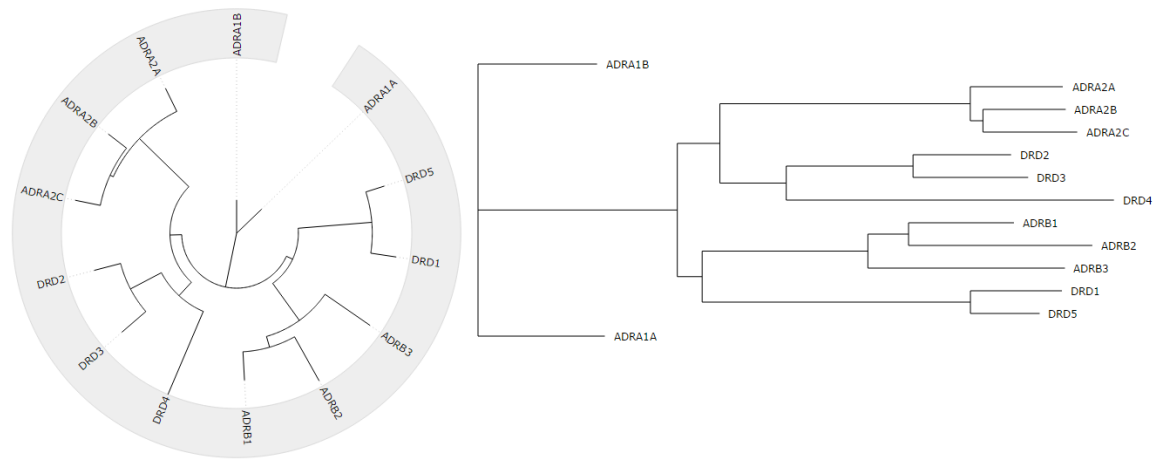

**Suppl. Fig. 3.** Phylogenetic tree of the human catecholamine receptors, built by considering all the residues included in the transmembrane domains. Plots done with GPCRDB software.<sup>108</sup>
